# Supplementary material
Source: ML conference proceedings conference paper supplement (https://openreview.net/forum?id=ET1UAOYeU42)

original loss:

```
loss = norm * (pos_weight * batch.adj_label * log_max(preds) \
               + (1 - batch.adj_label) * log_max(1 - preds)) * adj_mask_batch
loss = - loss.mean()
```

where

- $\text{pos\_weight} = \frac{|\mathcal{E}^c|}{|\mathcal{E}|} = \frac{N^2 - |\mathcal{E}|}{|\mathcal{E}|},$
- $\text{norm} = \frac{N^2}{2 \cdot |\mathcal{E}^c|},$
- $\text{.mean()} \Leftrightarrow \cdot \frac{1}{N^2}.$

As a result,

- weight on edges:  $\frac{|\mathcal{E}^c|}{|\mathcal{E}|} \cdot \frac{N^2}{2 \cdot |\mathcal{E}^c|} \cdot \frac{1}{N^2} = \frac{1}{2|\mathcal{E}|},$
- weight on non-edge:  $\frac{N^2}{2 \cdot |\mathcal{E}^c|} \cdot \frac{1}{N^2} = \frac{1}{2|\mathcal{E}^c|}.$

---

+ Code

+ Text

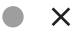

Supplement: supplementary_material [file attachment]
